# Supplementary material for: A New Side-effect of Sufentanil: Increased Monocyte-endothelial Adhesion
Source: Research Square preprint supplement (doi:10.21203/rs.3.rs-278451/v1), 2021-03-06

## **A new side-effect of sufentanil: increased monocyte-endothelial adhesion**

**Dongdong Yuan<sup>1#\*</sup>, Zhaowei Zou<sup>2#</sup>, Xianlong Li<sup>1</sup>, Nan Cheng<sup>1</sup>, Na Guo<sup>1</sup>,**

**Guoliang Sun<sup>1\*</sup>, Dezhao Liu<sup>1\*</sup>**

<sup>1</sup>Department of Anesthesiology, the third affiliated hospital of Sun Yat-sen university,

Tianhe Road, Guangzhou, Guangdong, P. R. China.

<sup>2</sup>Department of General Surgery, Zhujiang Hospital, Southern Medical University,

Guangzhou, China

#These authors contributed equally to this study.

### **\*Correspondence:**

Dezhao Liu, Guoliang Sun, and Dongdong Yuan

Department of Anesthesiology, the Third affiliated hospital of Sun Yat-sen University,

Tianhe Road, Guangzhou, Guangdong, P. R. China. Tel: +86-20-85253132, Email:

[sumsldz@126.com](mailto:sumsldz@126.com); yuandongdong123@126.com

Supplementary Figure 1

original blots

U937 cells

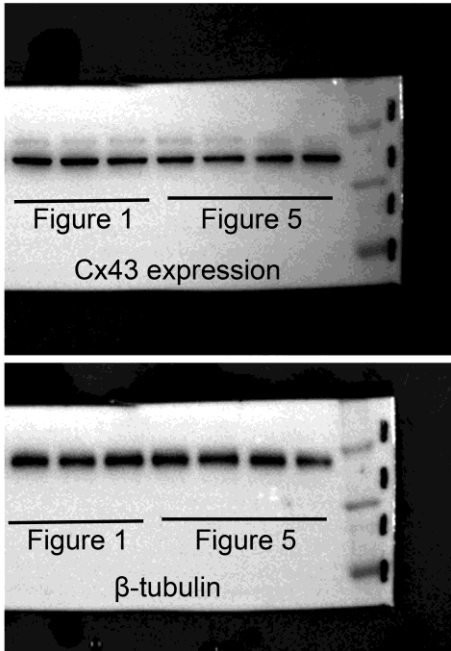

HUVEC cells

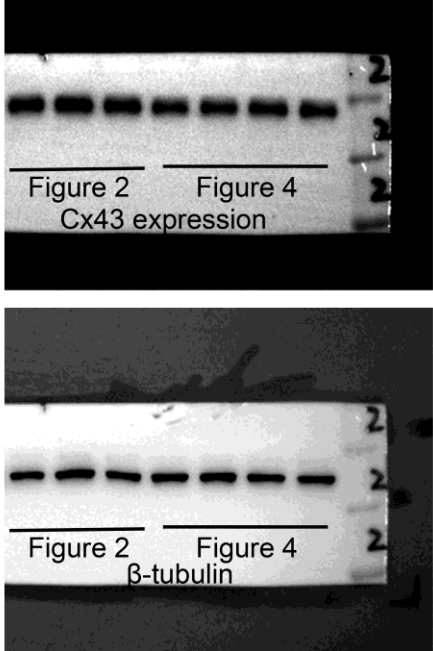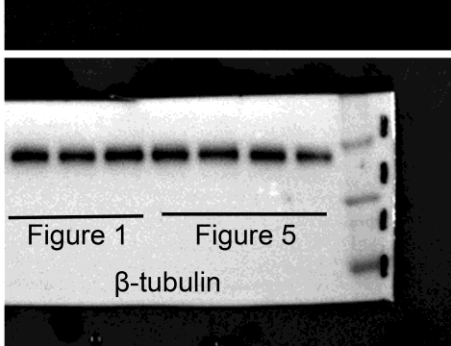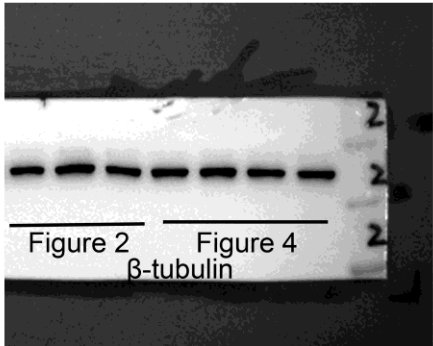

Supplement: Supplementary file 1 [file 174988322ac2cc4688ce83fe.pdf]
